# Supplementary material for: Prehabilitation of elderly frail or pre-frail patients prior to elective surgery (PRAEP-GO): study protocol for a randomized, controlled, outcome assessor-blinded trial
Source: Springer Nature journal article supplement (doi:10.1186/s13063-022-06401-x), 2022-06-06
Supplement: MOESM1 [file 23131540]

**The following investigators are contributing to PRAEP-GO:**

**Charité - Universitätsmedizin Berlin, Berlin, Clinic for Anesthesiology and Operative Intensive Care Medicine (CVK, CCM):** Friedrich Borchers, Rudolf Mörgeli, Eva Schönenberger, Philipp Klassen

**Charité - Universitätsmedizin Berlin, Berlin, Clinic for Anesthesiology and Operative Intensive Care Medicine (CBF):** Bernadette Kleikamp, Philipp Brandhorst

**A-K-tiv Therapiezentrum, Eutin:** Anna-Lena H. Spiegel

**Ambulantes Rehasentrum Ottobrunn, München:** Bernhard Papenfuß

**AMEOS Krankenhausgesellschaft Ostholstein mbH, Middelburg:** Jens Dowideit

**Back to Activity München, Munich:** Caroline Oefele

**BG Klinikum Unfallkrankenhaus Berlin, Berlin:** Volker Gebhardt, Kristina Zappel

**Brandenburgklinik Berlin-Brandenburg, Bernau:** Mehmet Gövercin

**Caritas Klinik Maria Heimsuchung Berlin, Berlin:** Thomas König, Claudio Chesi

**Charité – Universitätsmedizin Berlin, Charité Physiotherapie- und Präventionszentrum, Berlin:**  
Anett Reißhauer

**Charité – Universitätsmedizin Berlin, Klinik für Geriatrie und Altersmedizin:** Adrian Rosada, Ursula Müller-Werdan

**Evangelisches Geriatriezentrum Berlin, Berlin:** Ursula Müller-Werdan

**evangelisches Krankenhaus Hubertus Berlin, Berlin:** Anja Heymann, Marion Hanke

**Klinik für Geriatrie Ratzeburg, Ratzeburg:** Jens Leymann

**Ludwig-Maximilians-Universität München, Munich:** Thomas Saller, Ann-Cathrin Bischof

**medico concept GmbH Rosenheim, Rosenheim:** Angelika Reisner

**Physioline München, Munich:** Wolf Leopold Albrecht

**Physiotherapie Köpenick, Berlin:** Julia Wojciechowski

**Reha Tagesklinik Berlin Pankow, Berlin:** Martina Schuldt

**Rehasport Schwabing & Giesing, München:** Michael Baum

**REHA-Zentrum CAROSSA, Berlin:** Dijana Brnabic

**Rehasentrum Teltow, Teltow:** Björn von Pickardt

**Sana Kliniken Sommerfeld, Kremmen:** Agnieszka Deutschmann

**Sport- & Gesundheitszentrum Königs Wusterhausen, Brandenburg:** Carsten Scholz

**Sport-REHA GmbH Berlin, Berlin:** Lars May

**St. Joseph Krankenhaus Berlin, Berlin:** Rahel Eckardt-Felmborg, Isabell Wenghöfer

**Technical University of Munich, Munich:** Manfred Blobner, Sima Sattari

**therapiePUNKT München, München:** Michael Dummert

**University Medical Center Schleswig-Holstein, Lübeck:** Carla Nau, Mareike Otto

**Vamed Rehabilitationszentrum Lübeck, Lübeck:** Ute Voß-Lümers

**Vivental Rehabilitation Berlin, Berlin:** Danny Lang

**Wiggert Physio, Lübeck:** Daniel Wiggert
